# Supplementary material for: Induction of synergistic non-apoptotic cell death by simultaneously targeting proteasomes with bortezomib and histone deacetylase 6 with ricolinostat in head and neck tumor cells
Source: PubMed Central journal article supplement — Oncol Lett. 2021 Jul 22;22(3):680. doi: 10.3892/ol.2021.12941 (PMC8323012; doi:10.3892/ol.2021.12941), 2021-07-22

Figure S1. Autophagy flux assay using CAL27-GFP-LC3-mCherry-LC3ΔG. Representative images of CAL27-GFP-LC3-mCherry-LC3ΔG cells assessed in Fig. 3A were shown. Cells were treated with the indicated reagents for 24 h. Scale bar, 100  $\mu$ m. RCS, ricolinostat; BTZ, bortezomib; Rapa, rapamycin; Baf, bafilomycin A1.

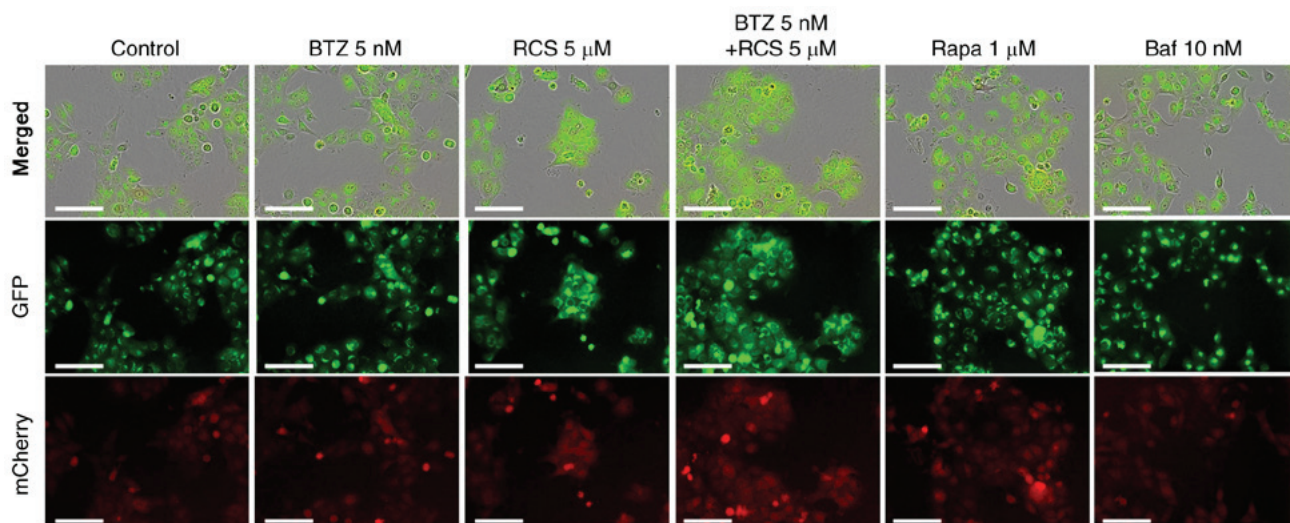

Figure S2. Transmission electron microscopy of CAL27 cells after treatment with BTZ and/or RCS. CAL27 cells were untreated or treated with BTZ (5 nM) and/or RCS (5 mM) for 24 h. The lower panels reveal enlarged images of the section indicated by the square box in the upper panels. N denotes nucleus. Scale bar, 6  $\mu\text{m}$  for upper panels and 1  $\mu\text{m}$  for lower panels. RCS, ricolinostat; BTZ, bortezomib.

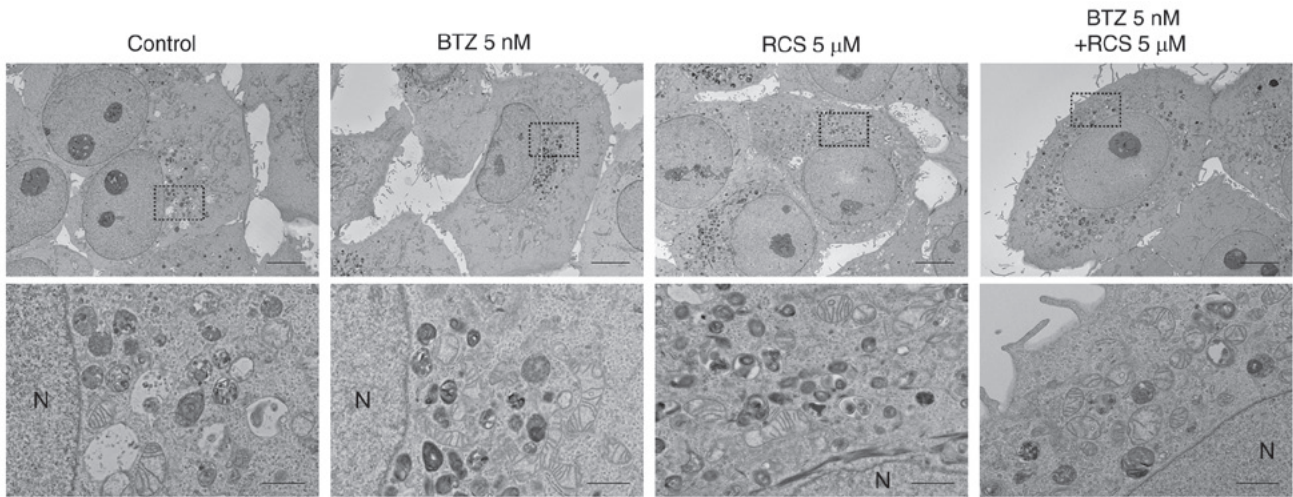

Figure S3. Immunofluorescence of acetylated- $\alpha$ -tubulin in CAL27 cells. CAL27 cells were untreated or treated with BTZ (5 nM) and/or RCS (5 mM) for 24 h. Immunofluorescence was determined using anti-acetylated  $\alpha$ -tubulin mAb. DAPI staining shows the position of the nucleus. Scale bar, 10  $\mu$ m. RCS, ricolinostat; BTZ, bortezomib.

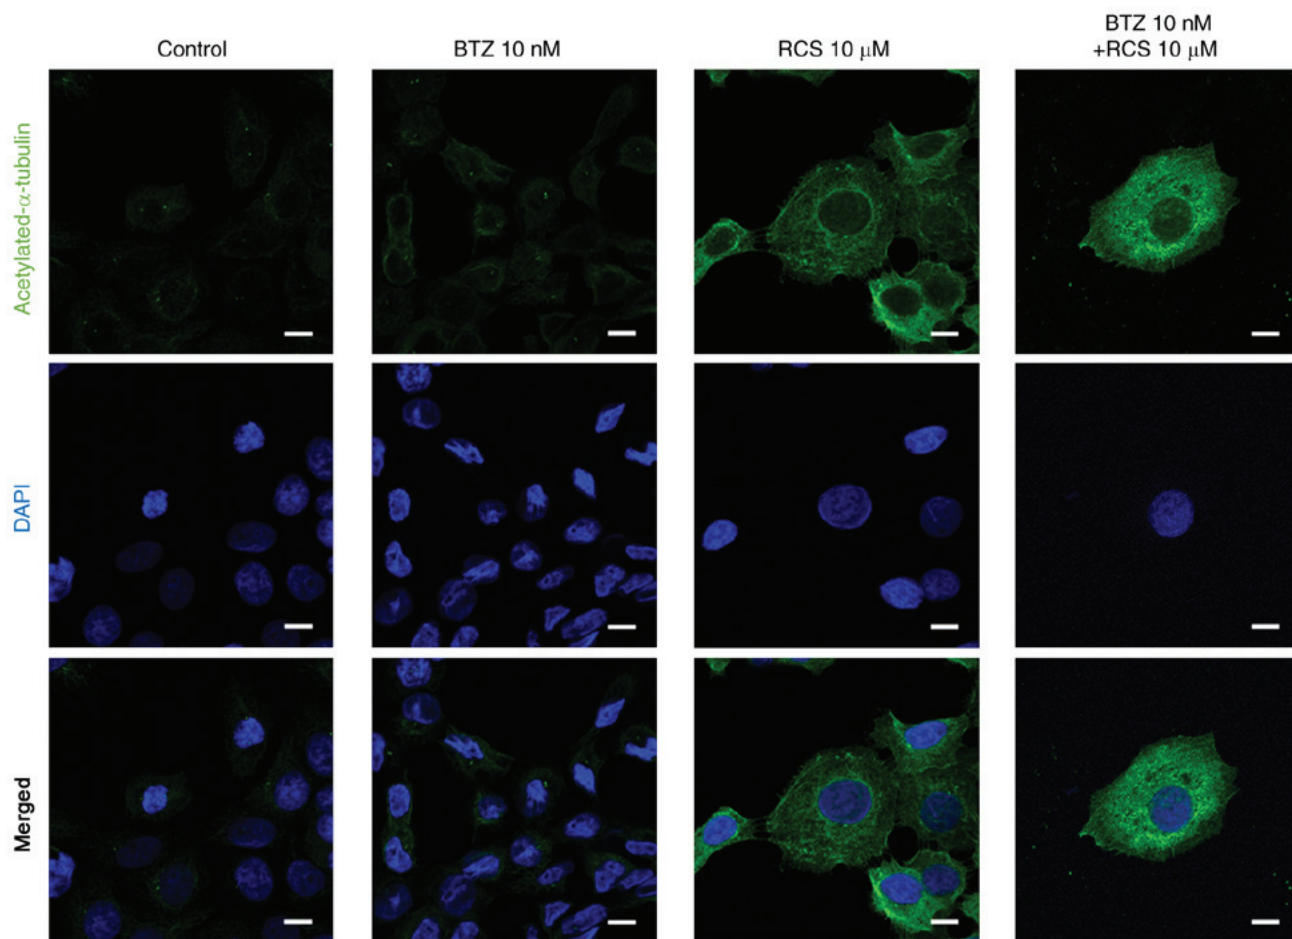

Supplement: Supplementary_Data.pdf [file Supplementary_Data.pdf]
